# Supplementary material for: Model evaluation of high-resolution urban climate simulations: using WRF ARW/LSM/SLUCM model as a case study
Source: Copernicus journal article supplement (doi:10.5194/gmd-2018-220), 2018-10-29
Supplement: Supplementary file [file gmd-2018-220-AC9-supplement.pdf]

# Supplementary Material

## S1 The Urban Climate Modelling System

We used the Advanced Research WRF (ARW) modelling system coupled with Noah LSM/UCM Model (Noah Land Surface Model/Urban Canopy Model) developed by National Center of Atmospheric Research in this study for the urban climate simulation.

- 5 It is a limited-area, non-hydrostatic and meso-scale atmospheric modelling system with the terrain-following mass vertical coordinate, designed for atmospheric research applications (Skamarock et al., 2005, 2008; Lo et al., 2008). The ARW model is a typical atmospheric model integrating with a set of five interacting physical components (Microphysics, Cumulus Parameterization, Radiation, Planetary Boundary Layer/Vertical Diffusion and Surface) (Skamarock et al., 2005, 2008).
- 10 The Noah LSM model is coupled with the ARW model by the surface component. The in-homogeneity of the surface affects energy and mass redistribution in the atmosphere. The Noah LSM model utilizes the following parameters in the representation of the in-homogeneous texture of the surface to simulate the land surface process.
- Land use
  - Land covers (vegetation)
  - 15 • Soil texture
  - Secondary parameters related to the above three primary parameters

## S2 The 2010 PRD Urban Land Surface Dataset

The 2010 PRD Urban Land Surface Dataset includes the land cover data, vegetation coverage data, urban morphology data, and anthropogenic heat data, for which the spatial resolution is 1-km<sup>2</sup>. The vegetation coverage includes 12 monthly vegetation coverage

- 20 maps. The urban morphology data includes the urban fraction, the fraction of building area, the mean building height area weighted, the building surface area to plan area ratio, the mean building height, the standard deviation of mean building height area weighted, and the frontal area index. The anthropogenic heat data includes the anthropogenic sensible heat and the anthropogenic latent heat.

S3 Design of the Four-days Simulation Segment

An atmosphere model initially needs to run for a period of time in order to stabilizing its own condition. Modelling results during this period is frustrating. Normally, to reduce the negative effect of model instability in the initial model run, the model result data is discarded. This procedure is called model spin-up. However, there is no statistical report told the modellers how long the spin-up for running a model is the best (Kleczeck et al. 2014). Nevertheless, a minimum spin-up time of 12 hours is necessary for balancing the NWP model (Jankov et al. 2007; Skamarock and Klemp, 2008; Kleczek et al. 2014). Moreover, practically in the atmosphere modeller community that the longer a simulation period is, the longer of the spin-up time is required. Similarly, if the period of a weather simulation case is too long, the results of the last few days might be distorted. Therefore, the appropriate simulation and spin-up periods would improve the quality of the result in a weather simulation case. To sum up, the period of a simulation segment was set to 4 days and the first day was used for the spin-up period.

In this study, one-year urban climate simulation case was divided into a series of sequent simulation segments. The first day of the next simulation segment overlaps with the last day of the previous simulation segment. The sequence of simulation segments for an urban climate simulation case is shown in Figure S1.

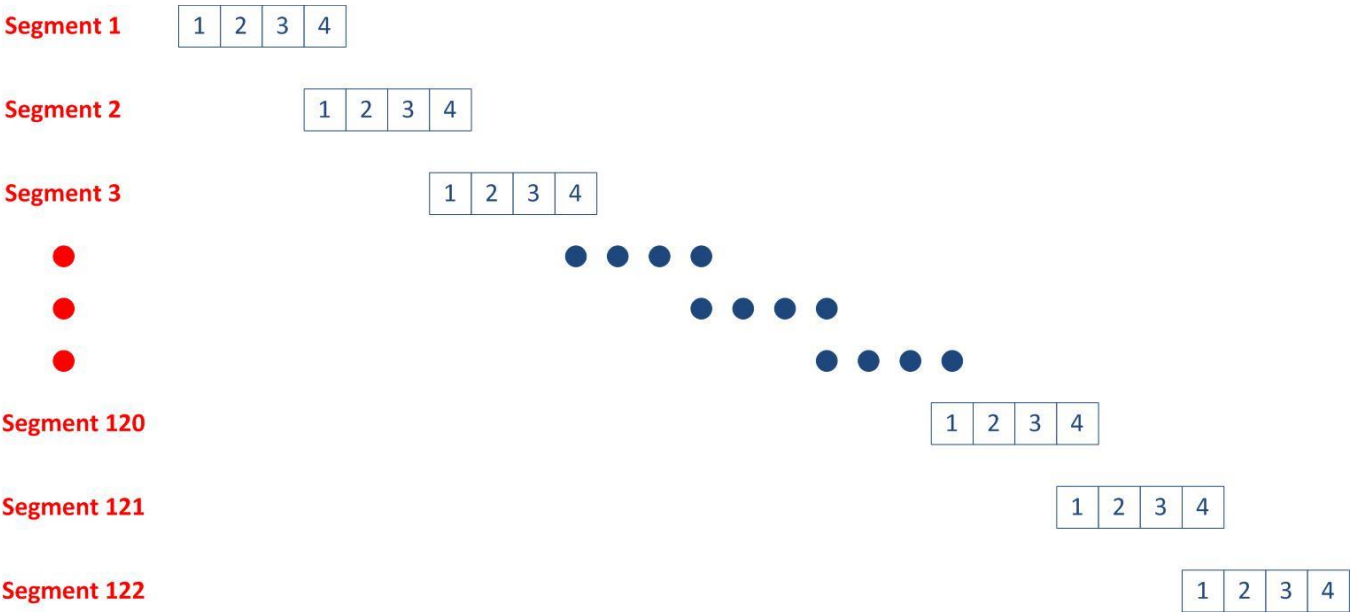

Figure S1: The Simulation Segments' Sequence.

## S4 Schemes Choosing for Physics Components of WRF ARW/Noah LSM/SLUCM

There are 7 **physical** components in the model, and each component has different candidate schemes.

(1) Cumulus Parameterization

(2) Microphysics

5 (3) Radiation

(4) Planetary Boundary Layer

(5) Surface layer

(6) Land Surface Model

(7) Urban Canopy Model

10

First, Cumulus Parameterization directly outputs the effects of physics process rather than simulates the physics process itself (Chen, 2011). The New Simplified Arakawa-Schubert scheme was chosen for Cumulus Parameterization, which supports deep and shallow convection and momentum transport for the ARW core.

15 Second, the microphysics component is responsible for the processes of resolved water, cloud and precipitation (Skamarock et al., 2005, 2008). Based on the sophistication ranking of the schemes, the WDM5 scheme was chosen for all domains in this study.

Third, the Radiation component simulates the atmospheric radiation processes in a vertical column of a horizontal grid. It consists of longwave and shortwave modules and uses the precipitation, water vapour and cloud-related variables as the inputs. It also  
20 exchanges the radiation fluxes related variables with the surface component and updates the potential temperature-related variables. The RRTMG scheme also was chosen as the shortwave and longwave radiation scheme because it supports the climatological ozone and aerosol data input **which** interacts with microphysics and cumulus parameterization components by Qc, Qr, Qi, and Qs.

Fourth, the land-surface models (LSMs) requires the input of the atmospheric data from surface layer component, the downward  
25 radiative fluxes from radiation component and the precipitation data from microphysics and cumulus parameterization components. It outputs the heat and moisture fluxes data to PBL component and the upward radiative fluxes to radiation component over land and sea-ice points (Skamarock et al., 2008). The Noah LSM was chosen as the scheme of land-surface model for the inner-most horizontal domain because the urban canopy model can only be coupled with Noah LSM.

30 Fifth, the Urban Canopy Model component is responsible for the physical processes of land surface in urban environment. The Single Layer Urban Canopy Model was chosen as the scheme of the Urban Canopy Model because of its sophistication.

Sixth, the Planetary Boundary Layer component simulates the vertical heat, moisture and momentum fluxes vertical diffusion **which are** caused by the turbulence exchanges in a whole column of a grid (Wang, 2014, 2015). The Bougeault–Lacarrere scheme was chosen for all domains because it supports the NUDAPT format data **that** used in this study for taking the urban morphology into account.

5

Seventh, in the WRF model, the Surface Layer component is responsible for providing the friction **stress**, the surface fluxes of heat and moisture to PBL (Skamarock et al., 2008). As a result of a comparison, the revised MM5 surface layer scheme was chosen for all horizontal domains in this study.

**S5 Guideline for Model Evaluation**

- 10
- We used four statistic figures (Table S1) in the practice of model evaluation. We first conducted a data processing operation (run by a program) on each pair of the raw observation dataset and its corresponding modelled result to produce an evaluation 3D-matrix which **consisted** of a one-year temporal series of 2D-matrixes. Each non-empty element of the 2D-matrixes geographically **corresponded** with a pair of observation data and its corresponding modelled one **at** a time point. A location map of meteorological observations was also produced if the raw observation dataset **was** a meteorological observation dataset. Secondly, we conducted
- 15
- the figure plotting operations (**using** the programs) on each evaluation 3D-matrix step by step to produce a series of statistic figures. Specially, we designed a guideline (Table S2) for specifying the intervals in the PDFD figure, which **were** used for measuring the accuracy. Finally, we conducted grading or checking operations on these statistic figures artificially **based** on the guidelines for grading (Table S3) or checking (Table S4).

**Table S1: The Statistic Figures for Model Evaluation.**

| Statistical Perspectives  | Methods                                           |                                                                                                                                                             |
|---------------------------|---------------------------------------------------|-------------------------------------------------------------------------------------------------------------------------------------------------------------|
|                           | Statistic Figures                                 | Usage                                                                                                                                                       |
| Descriptive Statistics    | Temporal Comparison of Spatial Variation (TCSV)   | It <b>was</b> used to temporally <b>compare</b> two variables’ spatial variation ranges and median in the whole year.                                       |
|                           | Diurnal Variation (DV)                            | It <b>was</b> used to temporally <b>compare</b> the diurnal variations of two variables’ spatial variation ranges and median in the whole year.             |
| Statistical Distributions | Probability Density Function of Difference (PDFD) | It <b>was</b> used to show the probability density of difference between the modelled variable and its corresponding observed one.                          |
|                           | Perkins Skill Score (PSS)                         | It <b>was</b> used for revealing quantifiably the extent of overlap between the observed and <b>modelled</b> variables’ Probability Density Function (PDF). |

|  |  |                                                                                                                                        |
|--|--|----------------------------------------------------------------------------------------------------------------------------------------|
|  |  | A value of 1 <b>indicated</b> a perfect modelling of the observation. On the contrary, a value of 0 <b>meant</b> the worst simulation. |
|--|--|----------------------------------------------------------------------------------------------------------------------------------------|

**Table S2: The Guideline for Specifying the Interval in a PDFD Figure.**

| No. | The Range of Coefficient (A) | Intervals |
|-----|------------------------------|-----------|
| 1   | 0.1 – 0.2                    | [-Aσ, Aσ] |
| 2   | 0.2 – 0.4                    |           |
| 3   | 0.4 – 0.6                    |           |

**Remark:** σ is the annual mean value of the monthly standard deviation of the modelled variable

5 **Table S3: The Guideline for Grading.**

| Range                 |                          | Grading      |
|-----------------------|--------------------------|--------------|
| PSS                   | Accuracy(a)              |              |
| $0.7 \leq PSS \leq 1$ | $70\% \leq a \leq 100\%$ | Good         |
| $0.7 > PSS \geq 0.5$  | $70\% > a \geq 50\%$     | Acceptable   |
| $PSS < 0.5$           | $a < 50\%$               | Unacceptable |

**Remark:** Accuracy is the PDFD value of interval 2 or interval 3.

**Table S4: The Guideline for Checking.**

| Statistic<br>Figures | Temporal Perspectives for Checking |                 |                 |
|----------------------|------------------------------------|-----------------|-----------------|
|                      | Annual                             | Monthly         | Daily           |
| TCSV                 | Annual Pattern                     | Monthly Pattern |                 |
| DV                   | Annual Pattern                     |                 | Diurnal pattern |

**S6 Observation Datasets**

- 10 A quality control **had** been applied to all meteorological observation datasets by the data provider. Table S1 shows the total number of observations and the numbers of observations in urban area and non-urban area. Moreover, Figures S2, S3, S4 and S5 show the locations of the meteorological observations.

**Table S1: The Numbers of Meteorological Observations**

| Type                 | Number in urban area | Number in non-urban area | Total number |
|----------------------|----------------------|--------------------------|--------------|
| 2-meters temperature | 34                   | 23                       | 57           |

|                      |    |    |    |
|----------------------|----|----|----|
| 10-meters wind speed | 37 | 26 | 62 |
| Precipitation        | 31 | 33 | 64 |
| Relative humidity    | 15 | 9  | 24 |

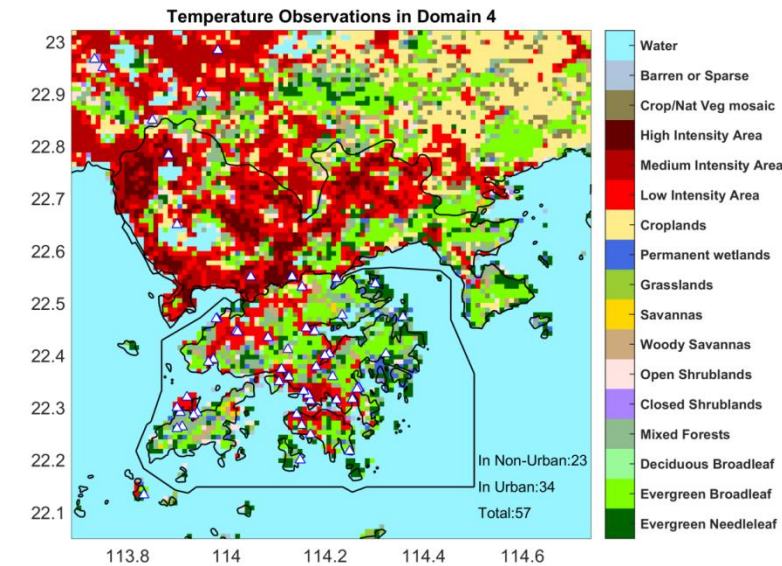

Figure S2: Temperature Observations in Domain 4.

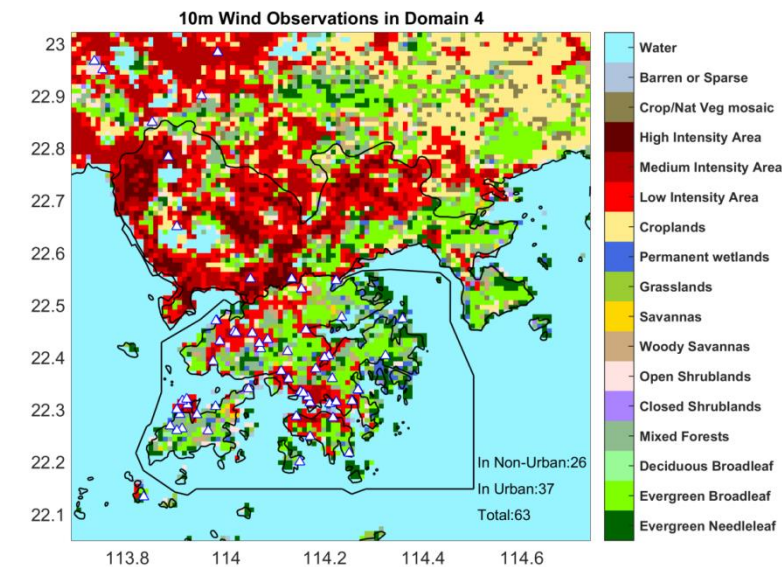

Figure S3: The 10-Meters Wind Observations in Domain 4.

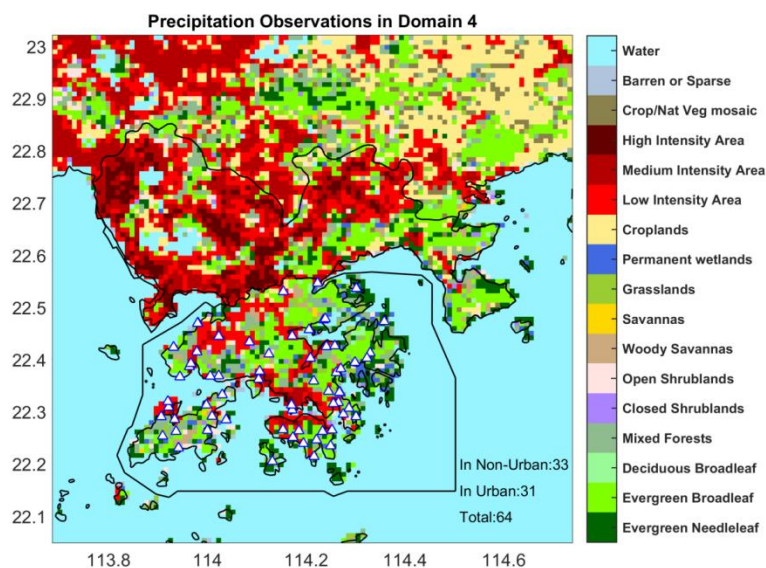

**Figure S4: Precipitation Observations in domain 4.**

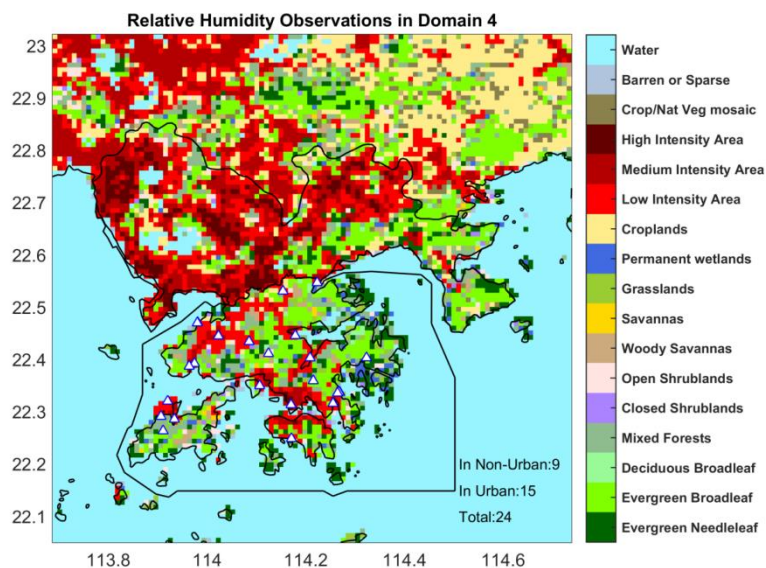

**Figure S5: Relative Humidity Observations in domain 4.**

- 5 The MODIS/Aqua Land Surface Temperature and Emissivity (LST/E) product (Short name: MYD11A1) provided by the U.S. Geological Survey (USGS) was used for the evaluation. This product includes a grid surface temperature with 1-km horizontal resolution at around 2:00 and 14:00 (Beijing time) per day. It also has a quality control attribute for each surface temperature record



to identify the level of data quality. Such quality control attribute **was** used for filtering the poor-quality records that **was** at least 5 degrees' different from the corresponding modelled value.

**S7 Figures for Comparisons in Surface Temperature, 10-Meters Wind Speed, Precipitation and Relative Humidity**

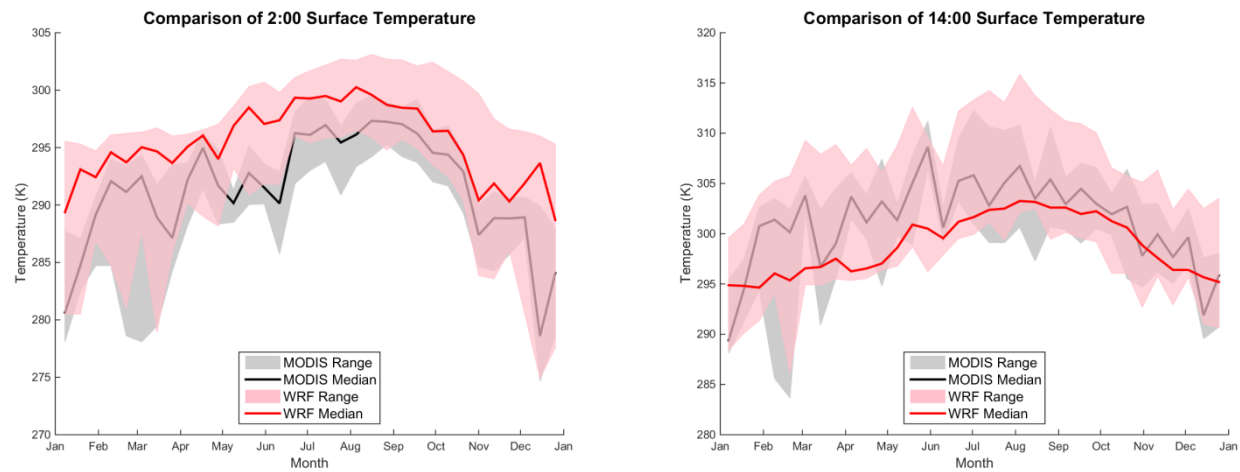

5 **Figure S6: Comparison of Modelled and MODIS Surface Temperatures at 2:00 and 14:00.**

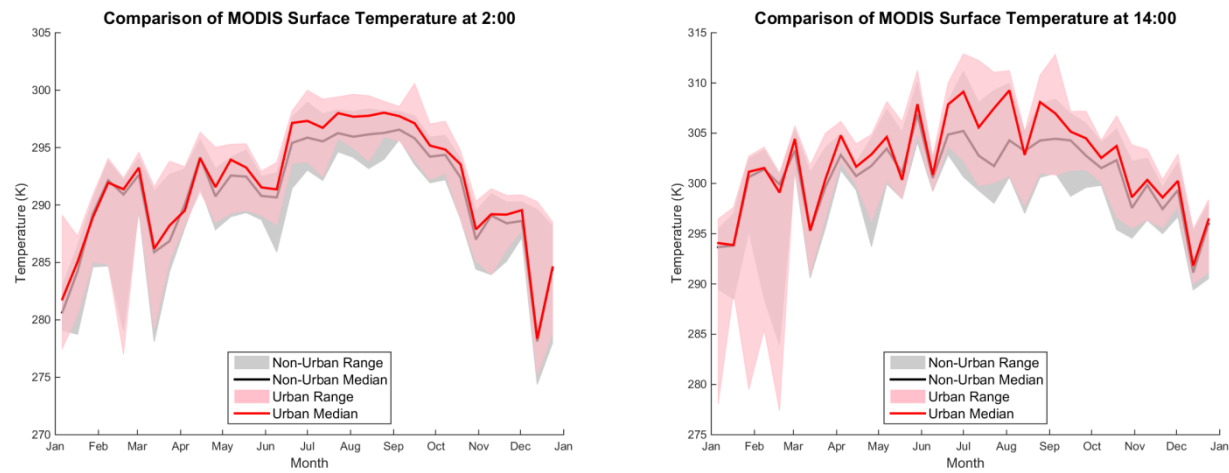

**Figure S7: Comparison of MODIS Surface Temperatures (at 2:00 and 14:00) in Urban and Non-Urban Areas.**



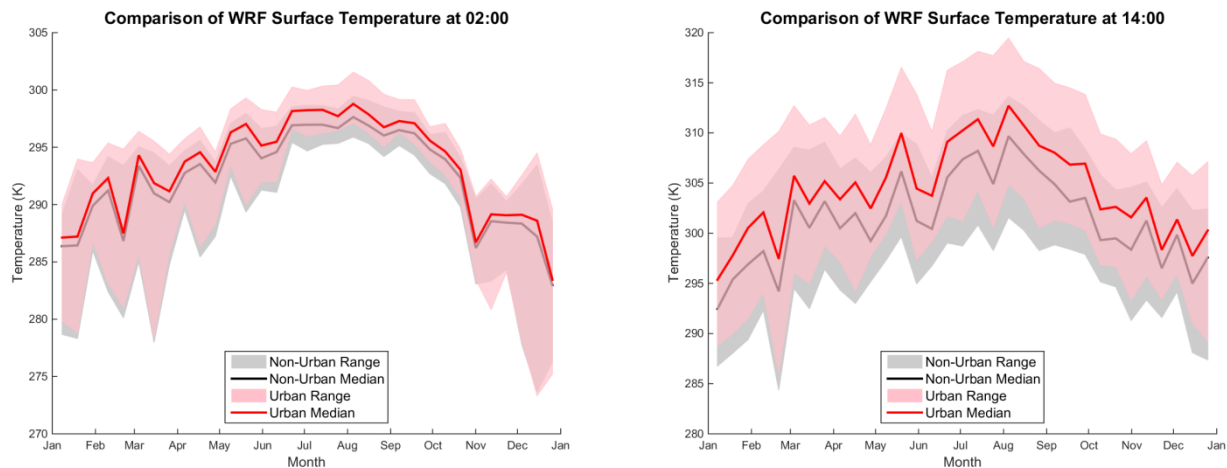

**Figure S8: Comparison of Modelled and Observed Surface Temperatures (at 2:00 and 14:00) in Urban Area and the Non-Urban area.**

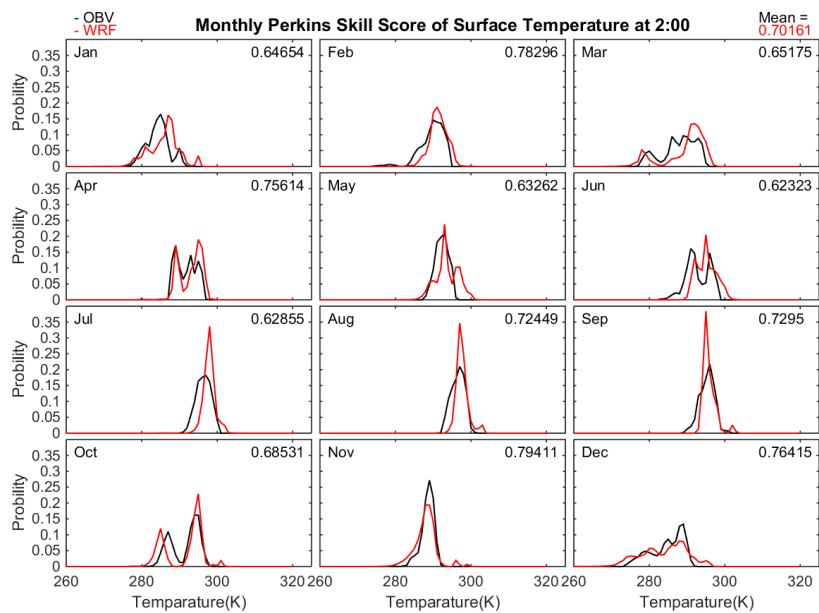

**Figure S9: Monthly PSS of Surface Temperature at 2:00.**

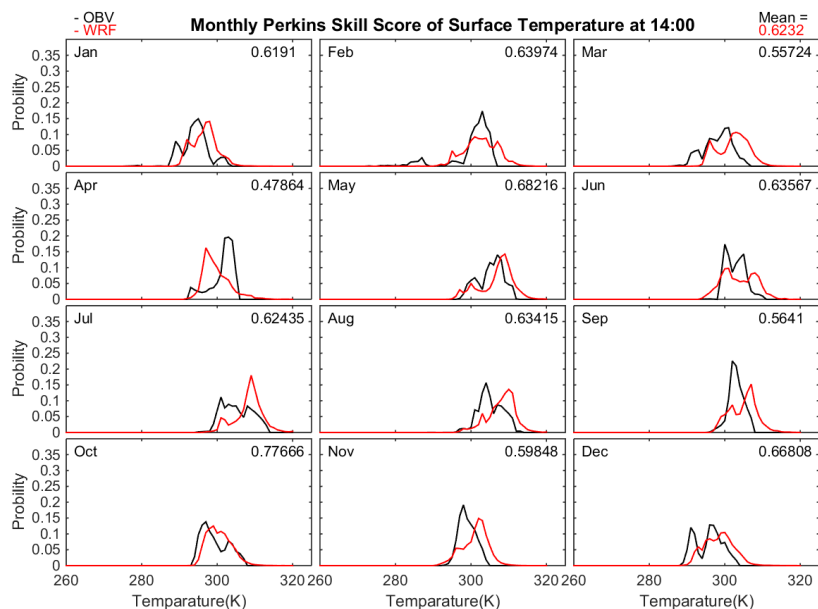

**Figure S10: Monthly PSS of Surface Temperature at 14:00.**

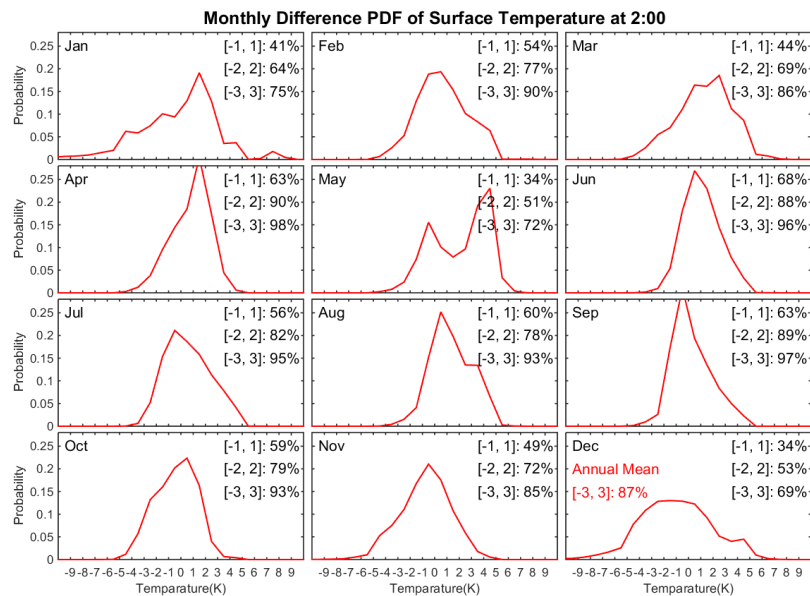

**Figure S11: Monthly PDF of 2:00 Surface Temperature Difference.**

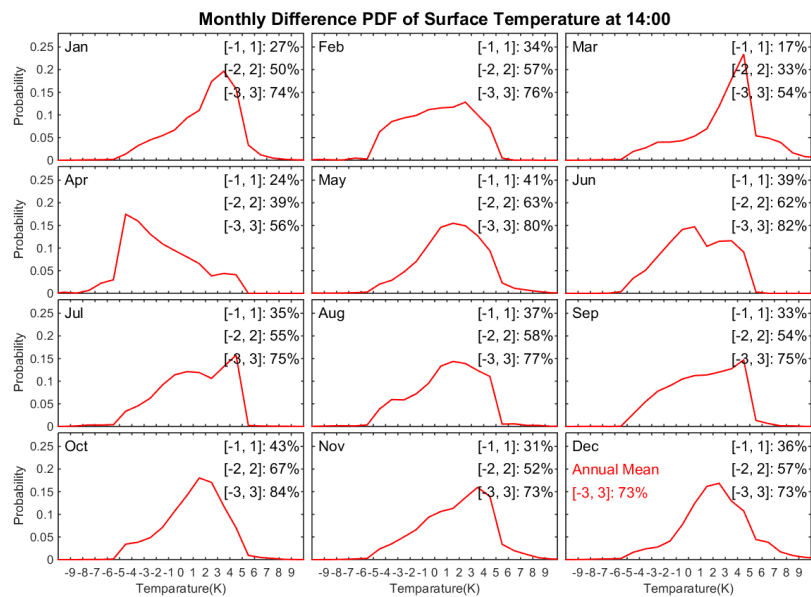

**Figure S12: Monthly PDF of 14:00 Surface Temperature Difference.**

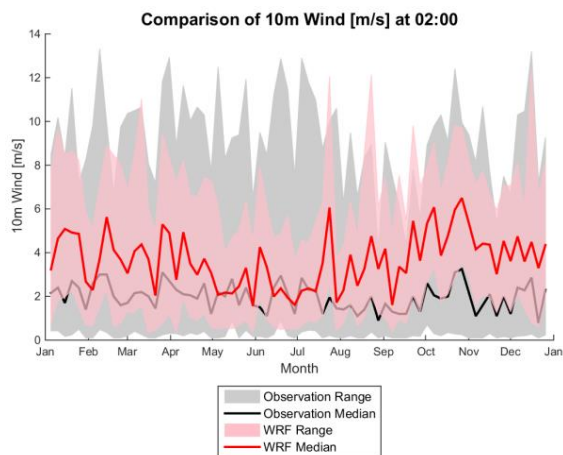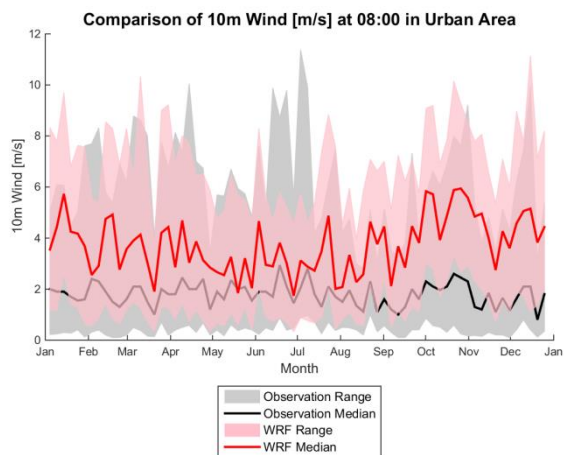

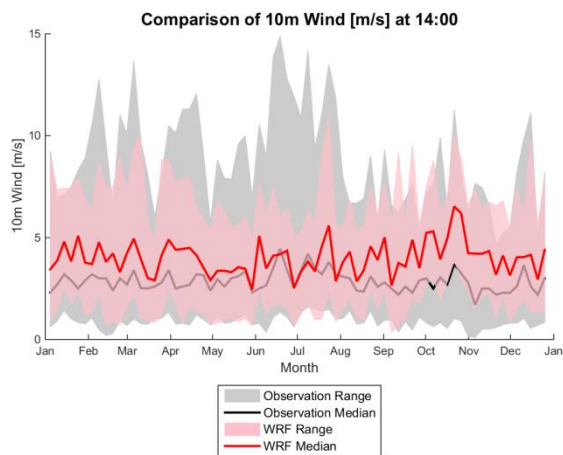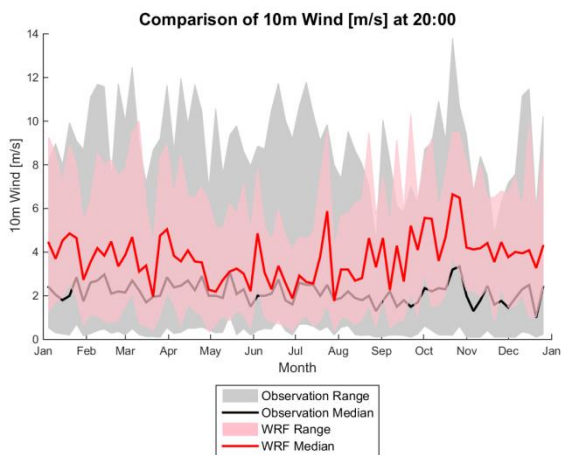

**Figure S13: Comparisons of Modelled and Observed 10-Meters Wind Speed at 2:00, 8:00, 14:00 and 20:00.**

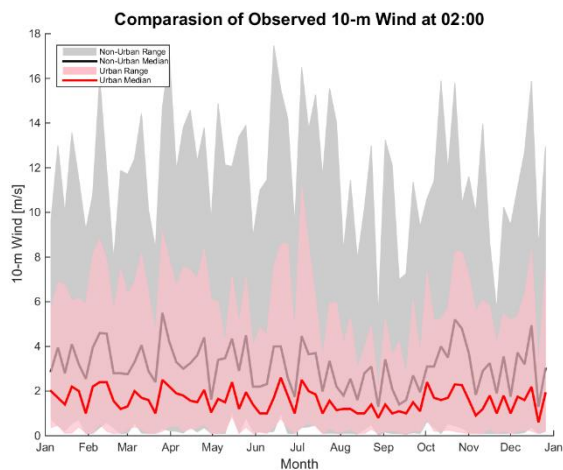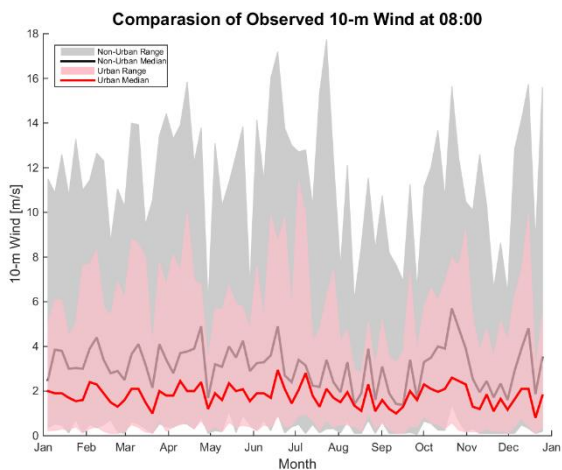

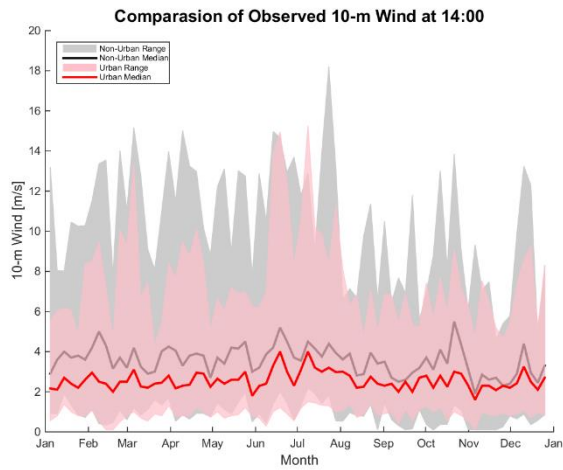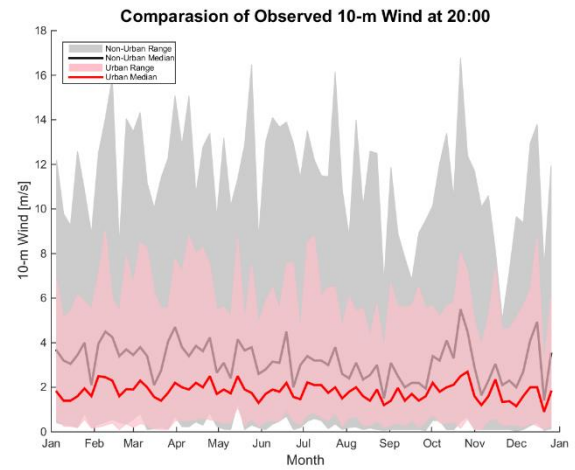

**Figure S14: Comparison of Observed 10-Meters Wind (at 2:00, 8:00, 14:00 and 20:00) in Urban Area and in the Non-Urban area.**

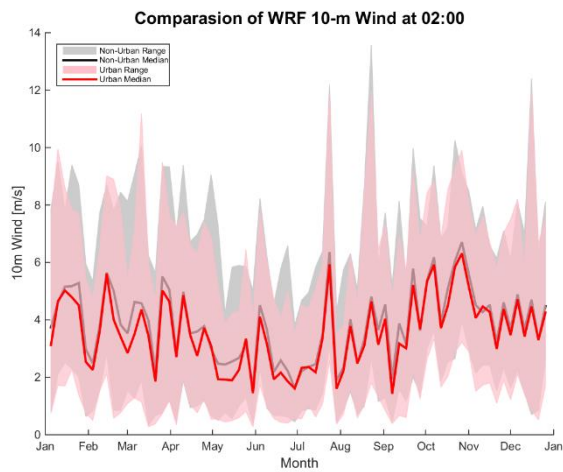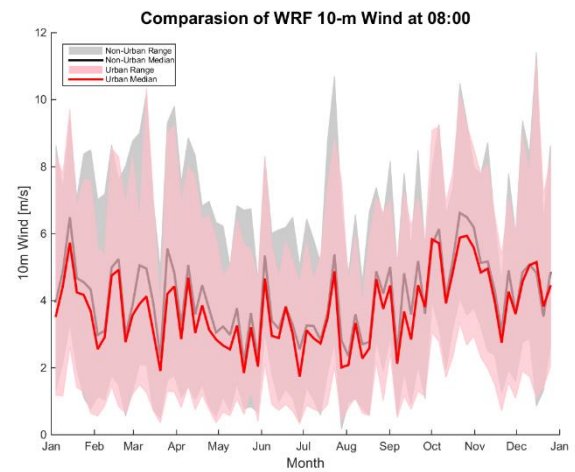

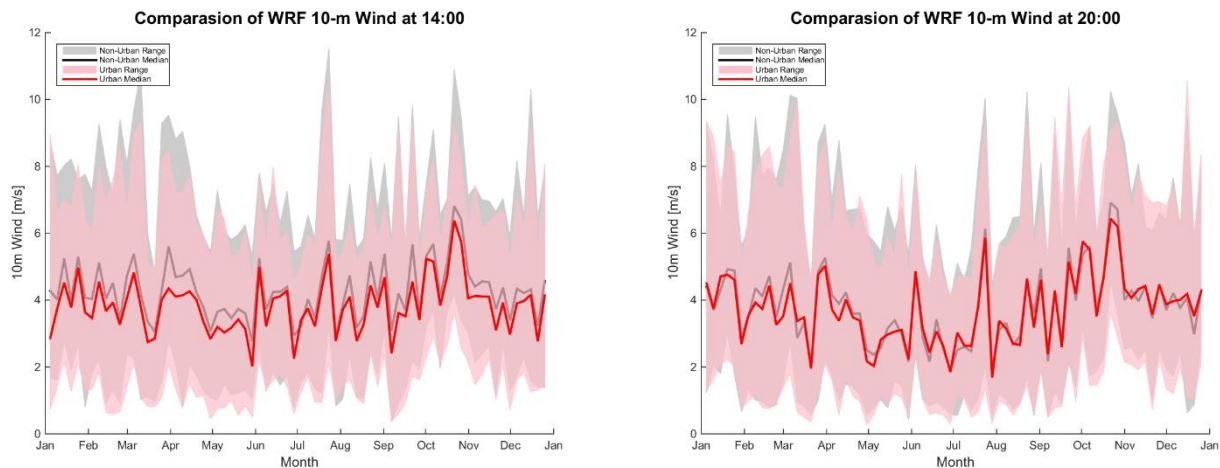

**Figure S15: Comparison of WRF 10-meters Wind (at 2:00, 8:00, 14:00 and 20:00) in Urban Area and in the Non-Urban area.**

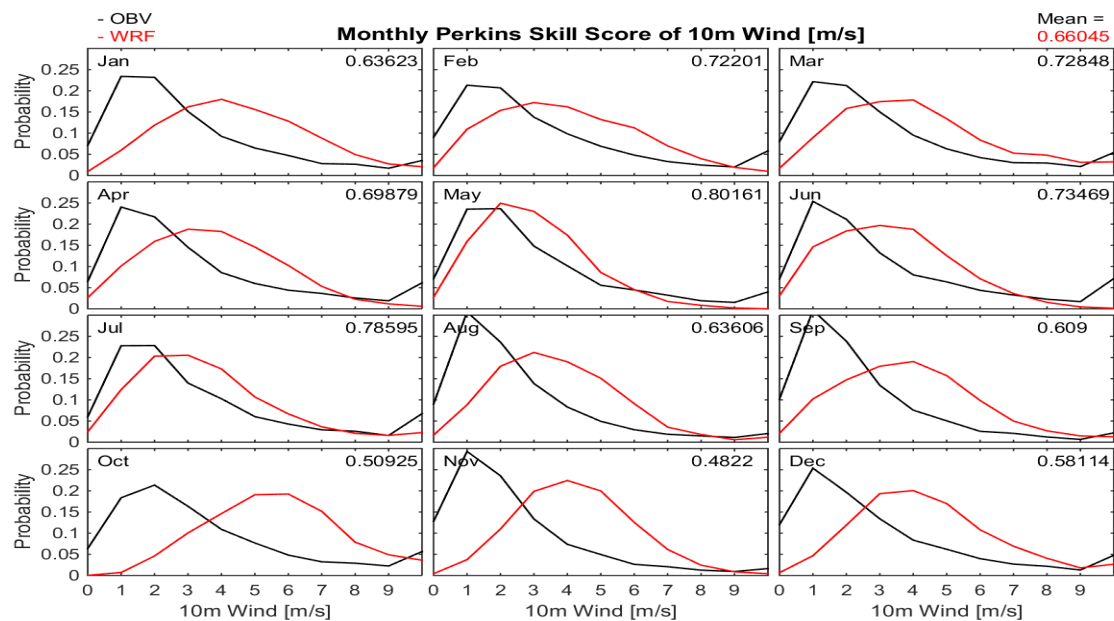

**5 Figure S16: Monthly PSS of 10-Meters Wind Speed.**

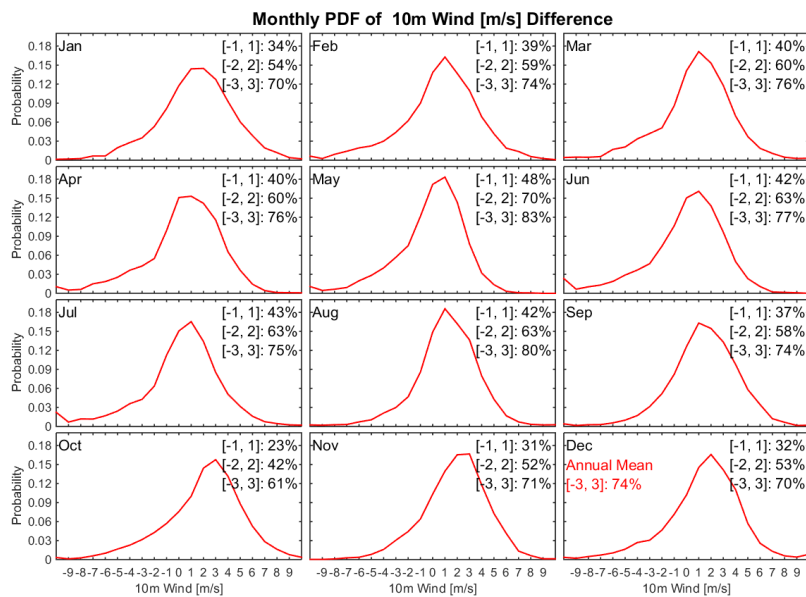

**Figure S17: Monthly PDF of 10-Meters Wind Speed Difference.**

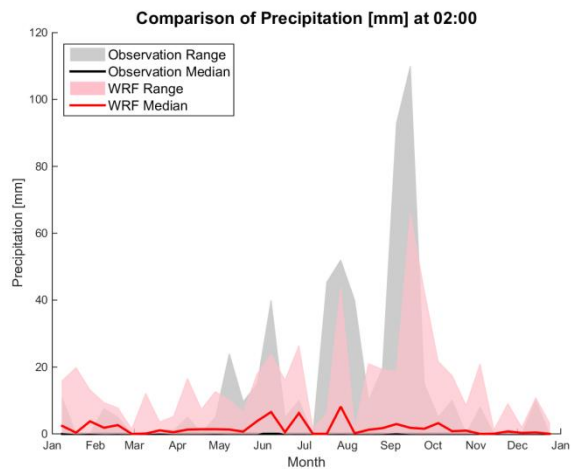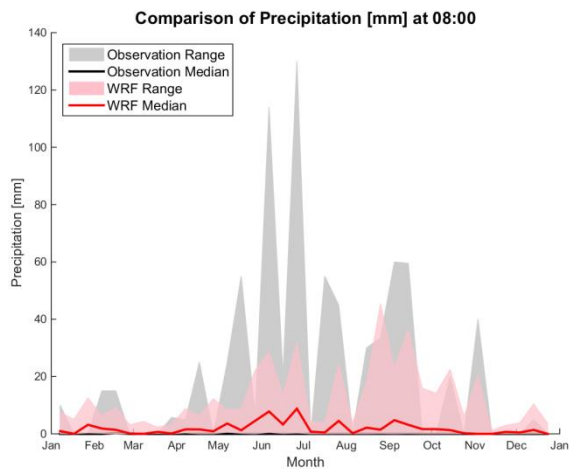



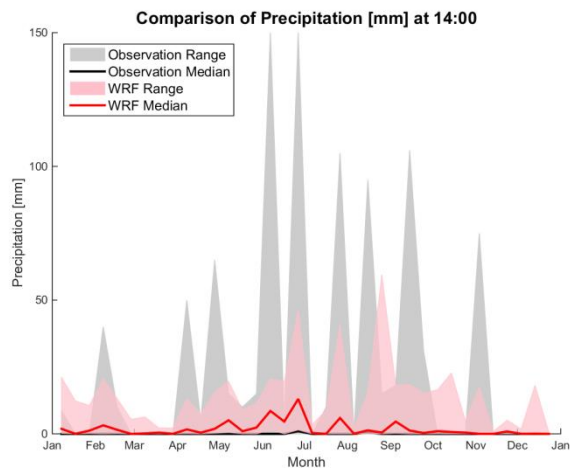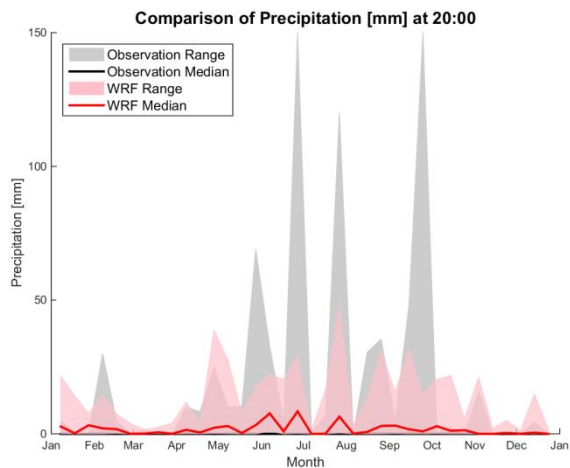

**Figure S18: Comparison of Modelled and Observed Precipitations at 2:00, 8:00, 14:00, and 20:00.**

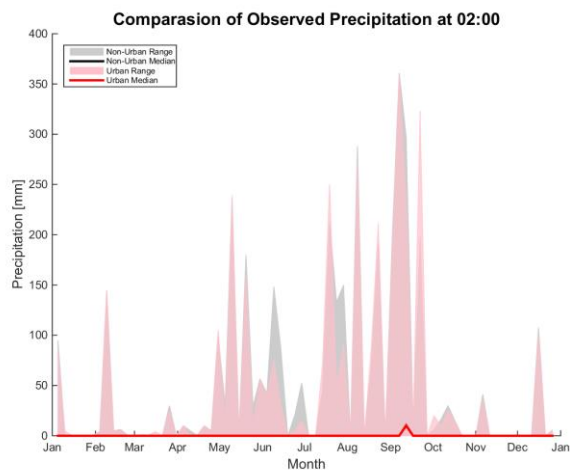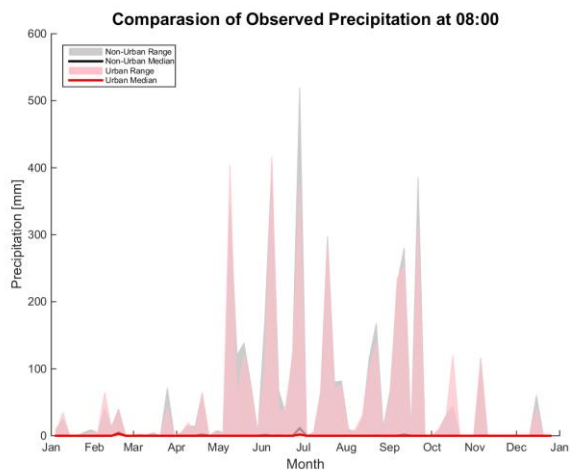

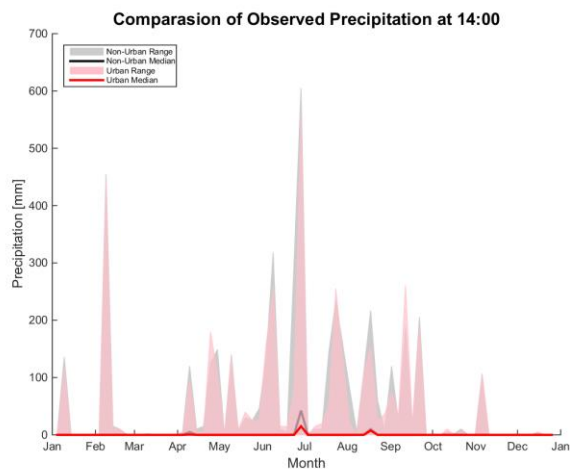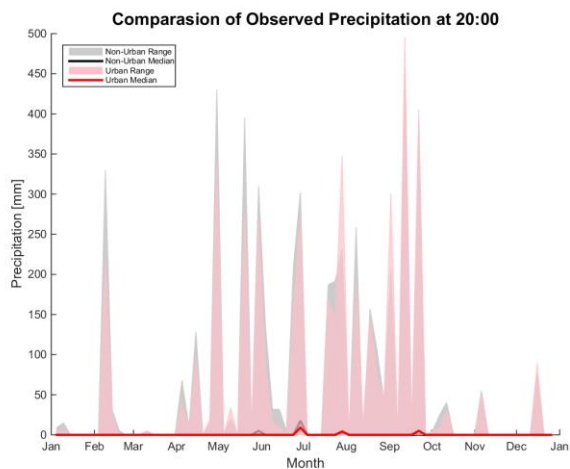

**Figure S19: Comparison of Observed Precipitation (at 2:00, 8:00, 14:00 and 20:00) in Urban Area and in the Non-Urban area.**

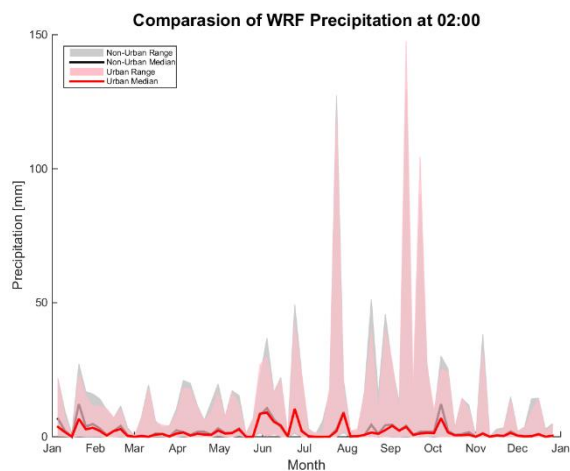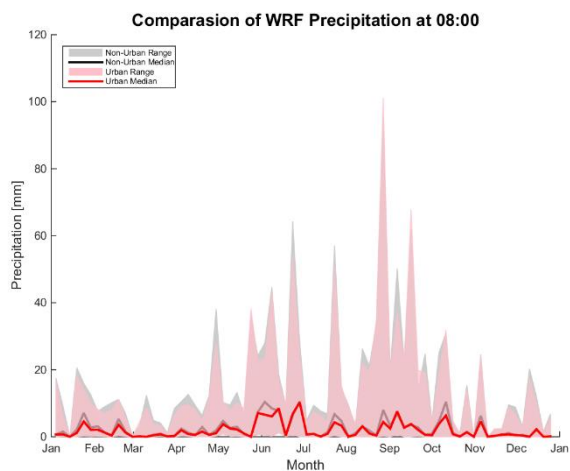

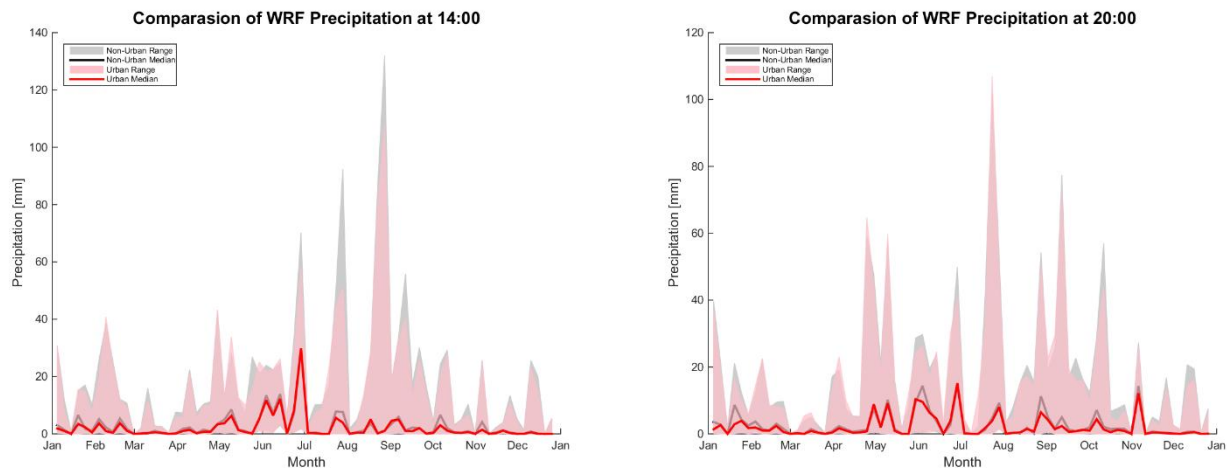

**Figure S20: Comparison of WRF Precipitation (at 2:00, 8:00, 14:00 and 20:00) in Urban Area and in the Non-Urban area.**

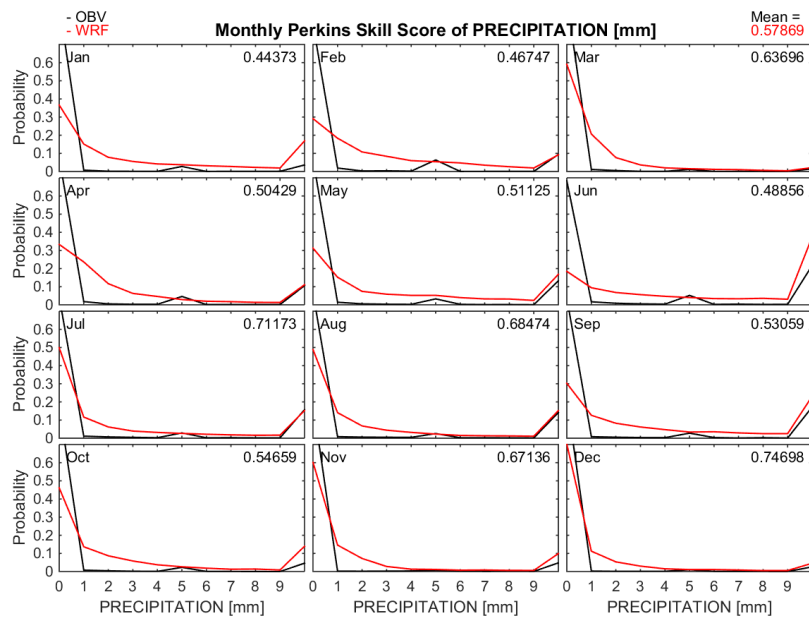

**Figure S21: Monthly PSS of Precipitation.**

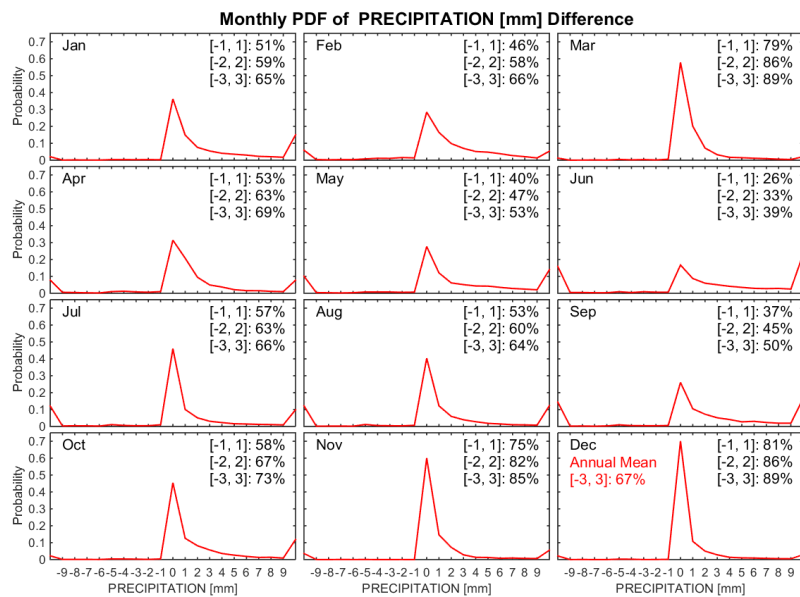

**Figure S22: Monthly PDF of Precipitation Difference.**

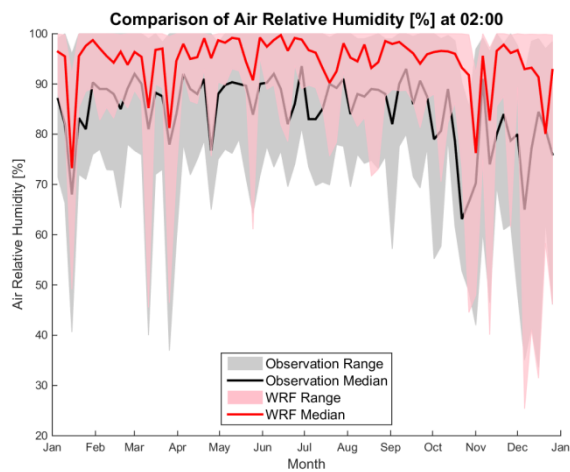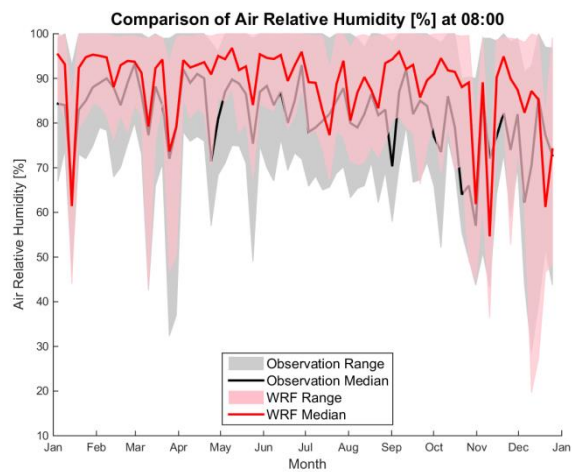

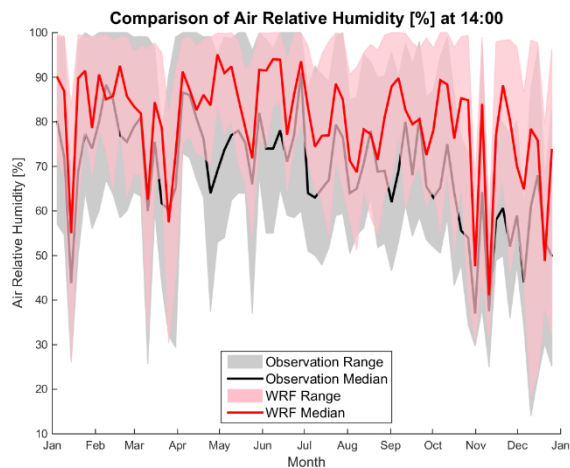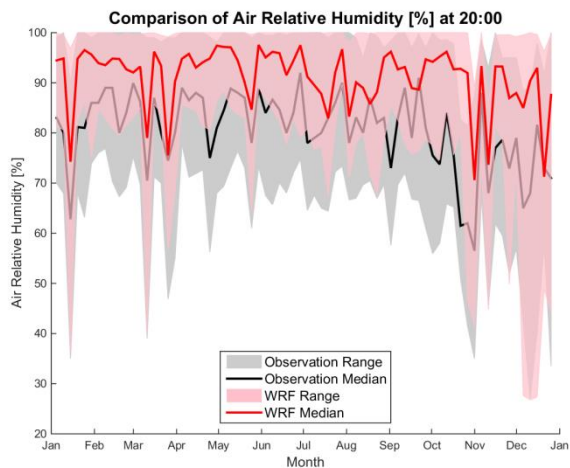

**Figure S23: Comparison of Modelled and Observed Relative Humidity at 2:00, 8:00, 14:00, and 20:00.**

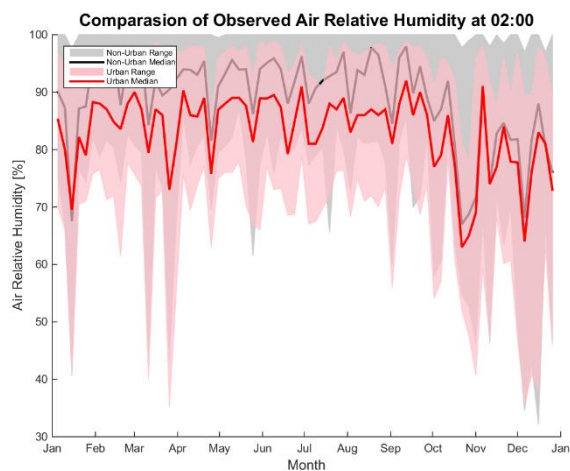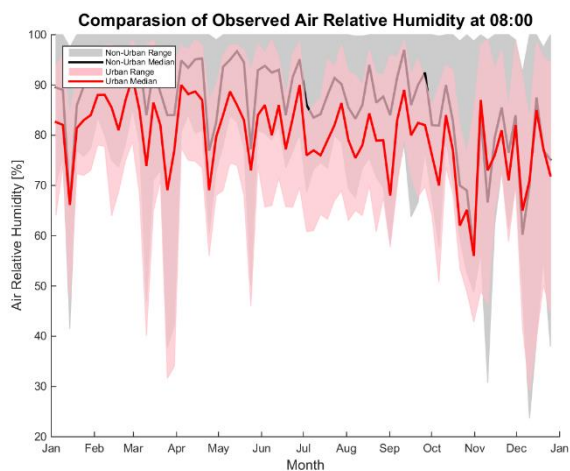

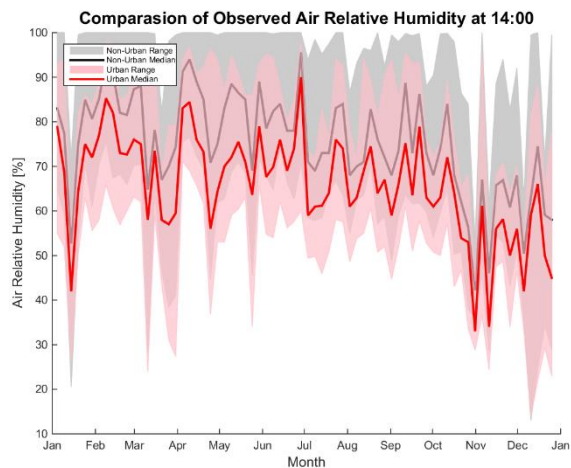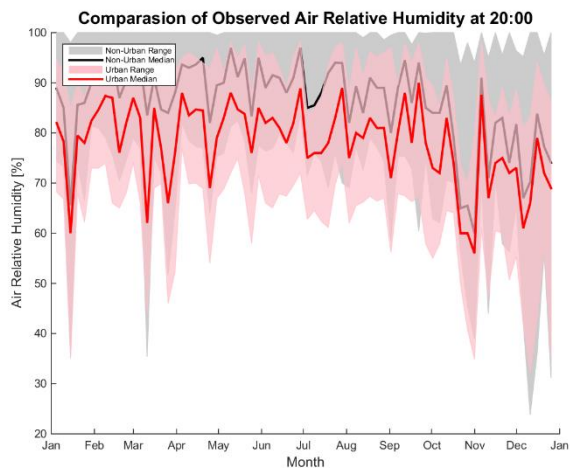

**Figure S24: Comparison of Observed Humidity (at 2:00, 8:00, 14:00 and 20:00) in Urban and in Non-Urban Areas.**

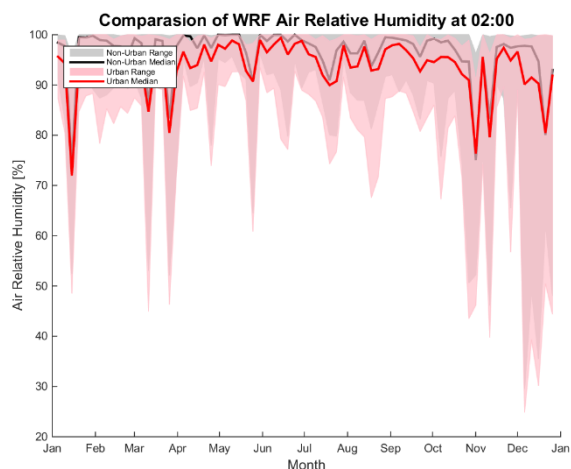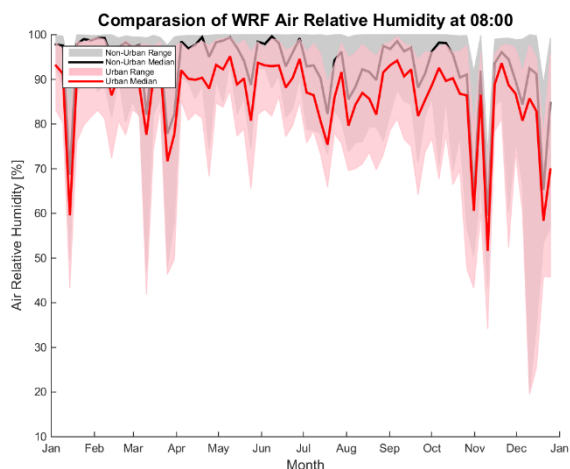

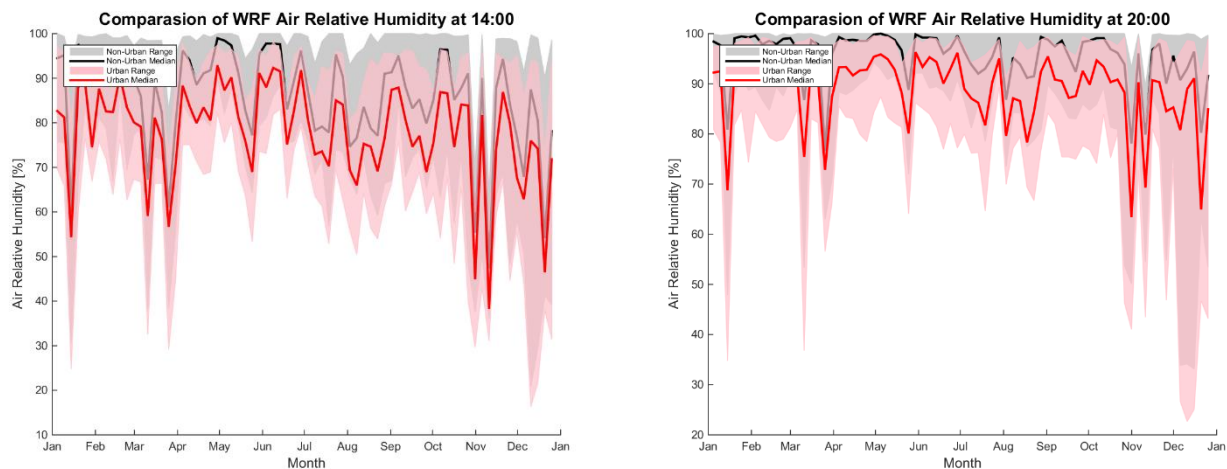

**Figure S25: Comparison of Modelled Relative Humidity (at 2:00, 8:00, 14:00 and 20:00) in Urban and Non-Urban Areas.**

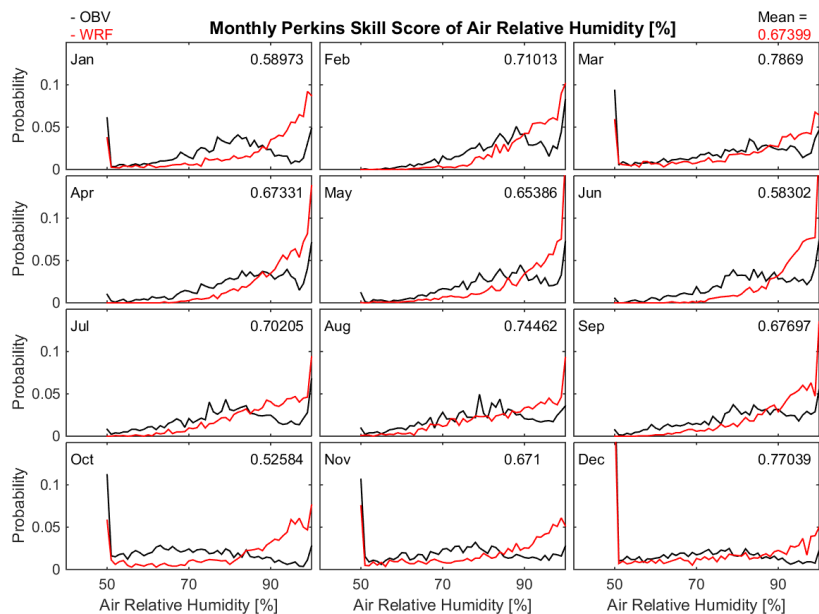

**Figure S26: Monthly PSS of Relative Humidity.**



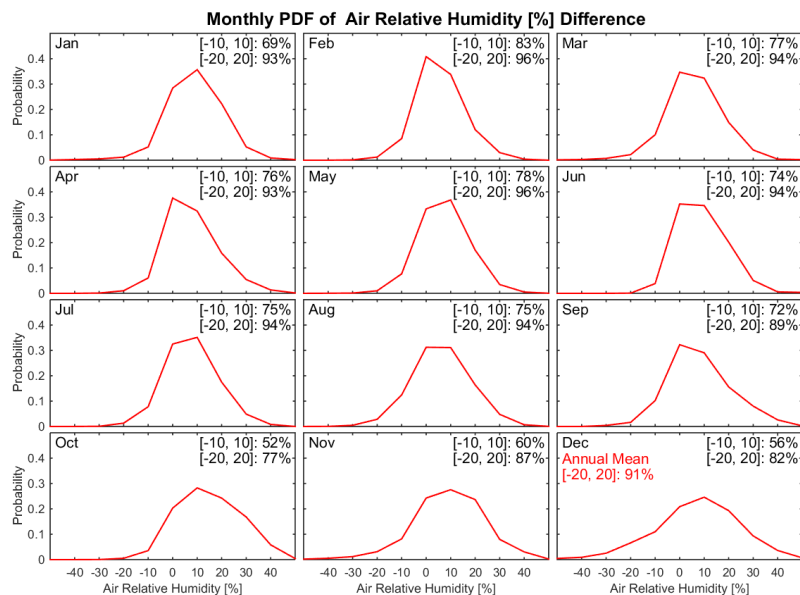

Figure S27: Monthly PDF of Humidity Difference.

## S8 The PSSs in Urban and Non-Urban Areas

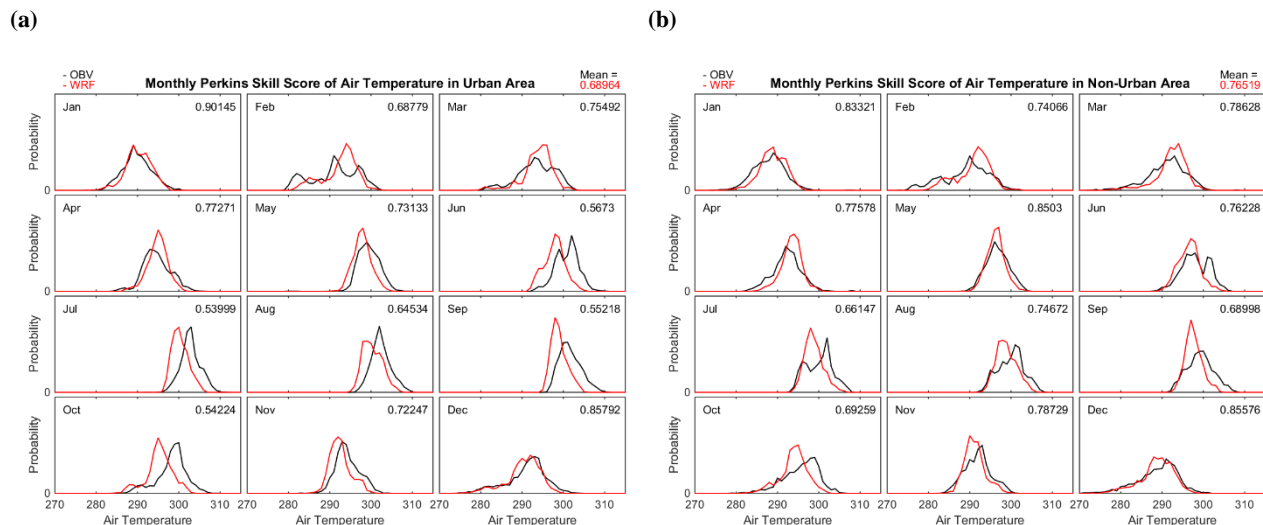

Figure S28: Monthly PSS of 2-Meters Air Temperature in Urban (a) and Non-Urban (b) Area.

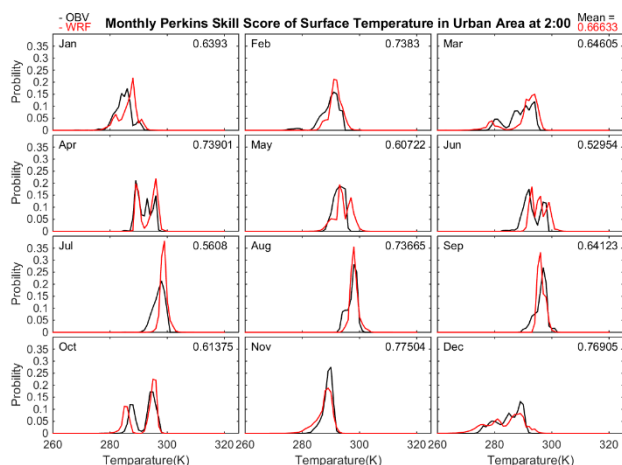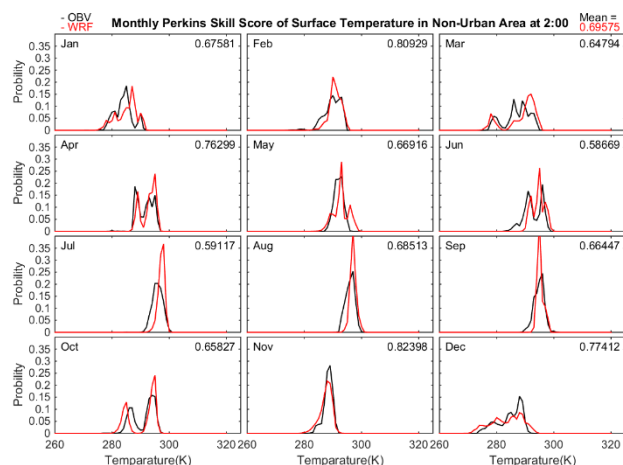

**Figure S29: Monthly PSS of Surface Temperature in Urban (a) and Non-Urban (b) Area.**

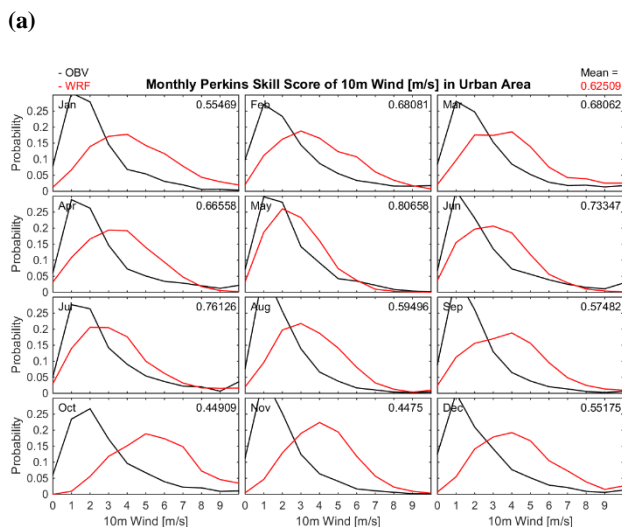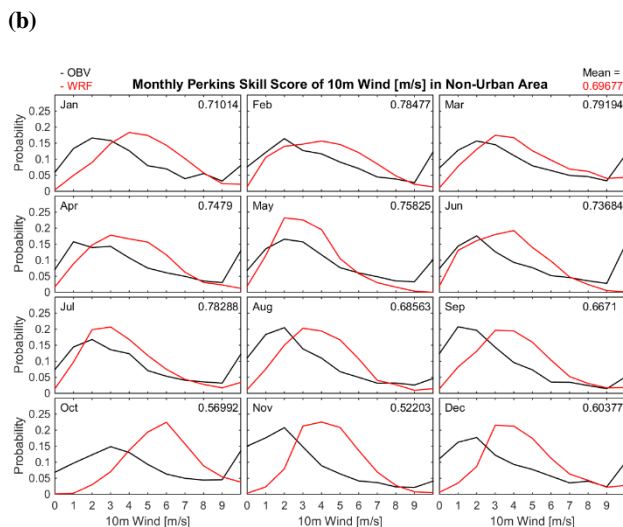

**5 Figure S30: Monthly PSS of 10-Meters Wind Speed in Urban (a) and Non-Urban (b) Area.**

(a) (b)

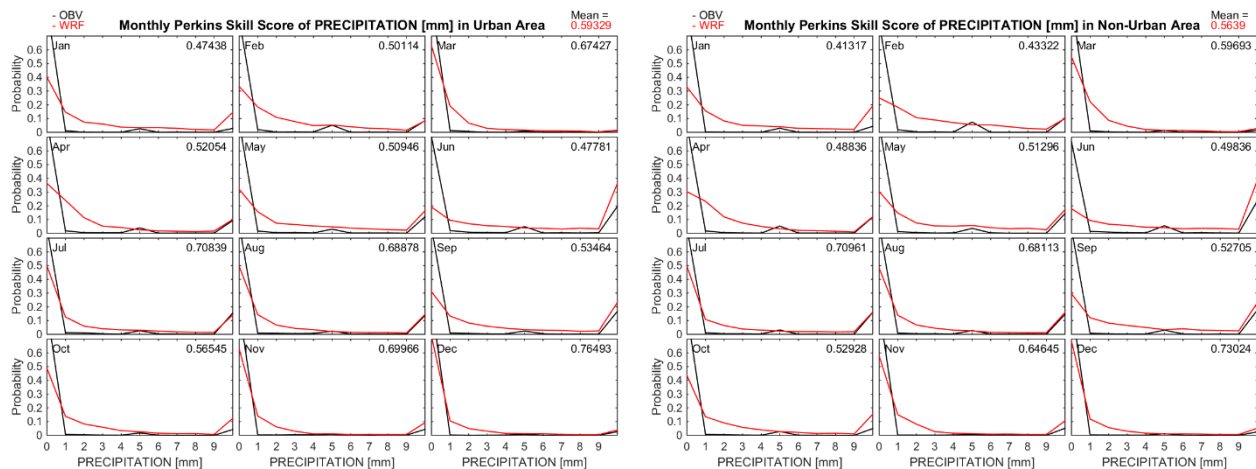

**Figure S31: Monthly PSS of Precipitation in Urban (a) and Non-Urban (b) Area.**

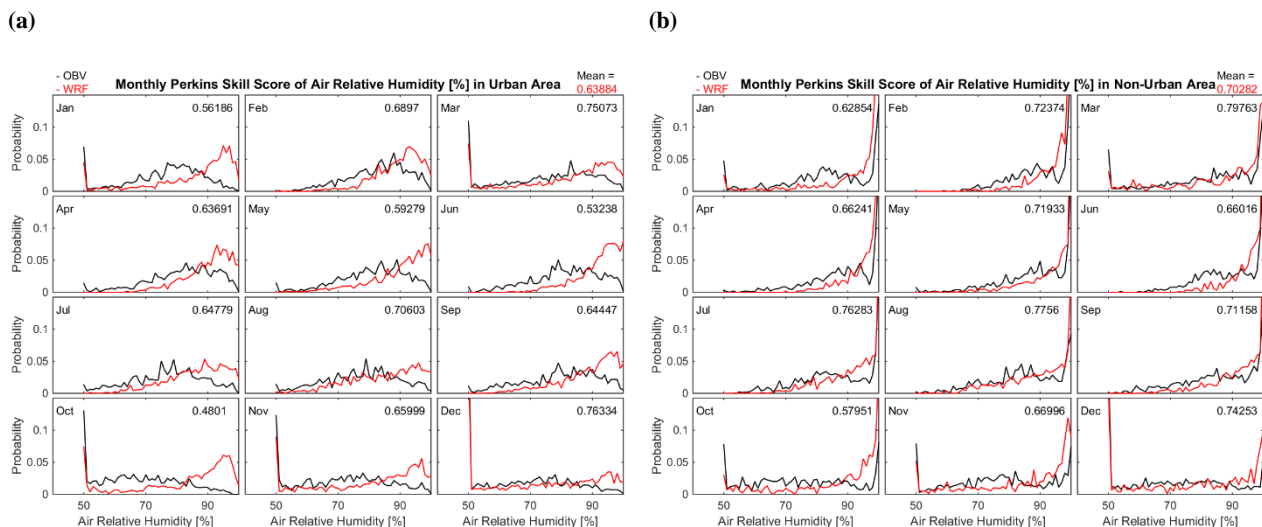

**Figure S32: Monthly PSS of Relative Humidity in Urban (a) and Non-Urban (b) Area.**

## S9 The Capabilities of WRF ARW/Noah LSM/SLUCM in Simulating Meteorological Phenomena

This paper aims to present a standardized methodological framework that can be used in all regions to evaluate the modelling performance rather than to examine the capabilities of the model in simulating meteorological phenomena in a specified region. Therefore, we proposed model evaluation methods for the comparison between modelled variables and its corresponding observed ones rather than investigating the meteorological phenomena in the modelled results. **Nevertheless**, the capabilities of a model in simulating meteorological phenomena are an important research direction but beyond the scope of this study. Therefore, we would

like to contribute some opinions about the capabilities of WRF ARW/Noah LSM/SLUCM in simulating meteorological phenomena to urban climate modellers for their reference.

5 **Firstly**, a reasonable temporal variation of the height of PBL can be seen in the modelled results but it cannot be examined by the observation because of unavailability of its corresponding observed ones. Secondly, the land-sea breeze **should be** observed in our study area because it is a coastal area. However, we didn't find out this phenomenon in the modelled results due to the temporal resolution of 6 hours **wasn't** enough fine for supporting the investigation of it (only four modelled variables of 10-meters wind speed at 2:00, 8:00, 14:00 and 20:00 on each day). Thirdly, the annual climatological variation in our study area **was** associated with the monsoon flow, especially the annual variations of 2-meters air temperature, 10-meters wind speed and precipitation. Figures 2, 13 and 16 **demonstrated** that the modelled 2-meters air temperature, 10-meters wind speed and precipitation **had the** same annual variation behaviour as its corresponding observed ones, which **indicated** that the model can simulate these climatological features in a study area affected by the monsoon flows. However, the model cannot reach the extreme value of these variables, especially the precipitation. Finally, the spatial distribution of temperature **was** strongly associated with the local land surface attributes. The model can simulate the temperature difference between in urban and non-urban area.

10
